# Supplementary material
Source: publisher figshare collection journal article supplement (https://gsajournals.figshare.com/articles/dataset/_/13233935)
Supplement: Supplementary file 1 [file 1]

# Table S4. Genotype of *Prdm9* in 10 generations of backcrosses used for preparation of chrosomal substitution strains.

| Line         | BC-1 | BC-2 | BC-3 | BC-4 | BC-5 | BC-6 | BC-7 | BC-8 | BC-9 | BC-10 |
|--------------|------|------|------|------|------|------|------|------|------|-------|
| B6.PWD-Chr1  | BP   | BB    |
| B6.PWD-Chr2  | BP   | BP   | NA   | NA   | BB   | BB   | BB   | BB   | BB   | BB    |
| B6.PWD-Chr3  | BP   | BB    |
| B6.PWD-Chr4  | BP   | BP   | NA   | BB    |
| B6.PWD-Chr5  | BP   | BP   | BB    |
| B6.PWD-Chr6  | BP   | BB    |
| B6.PWD-Chr17 | BP    |
| B6.PWD-Chr18 | BP   | BB    |
| B6.PWD-Chr19 | BP   | BP   | NA   | NA   | BB   | BB   | BB   | BB   | BB   | BB    |
