# Supplementary material
Source: publisher figshare collection journal article supplement (https://gsajournals.figshare.com/articles/dataset/_/13233935)
Supplement: Supplementary file 2 [file 1]

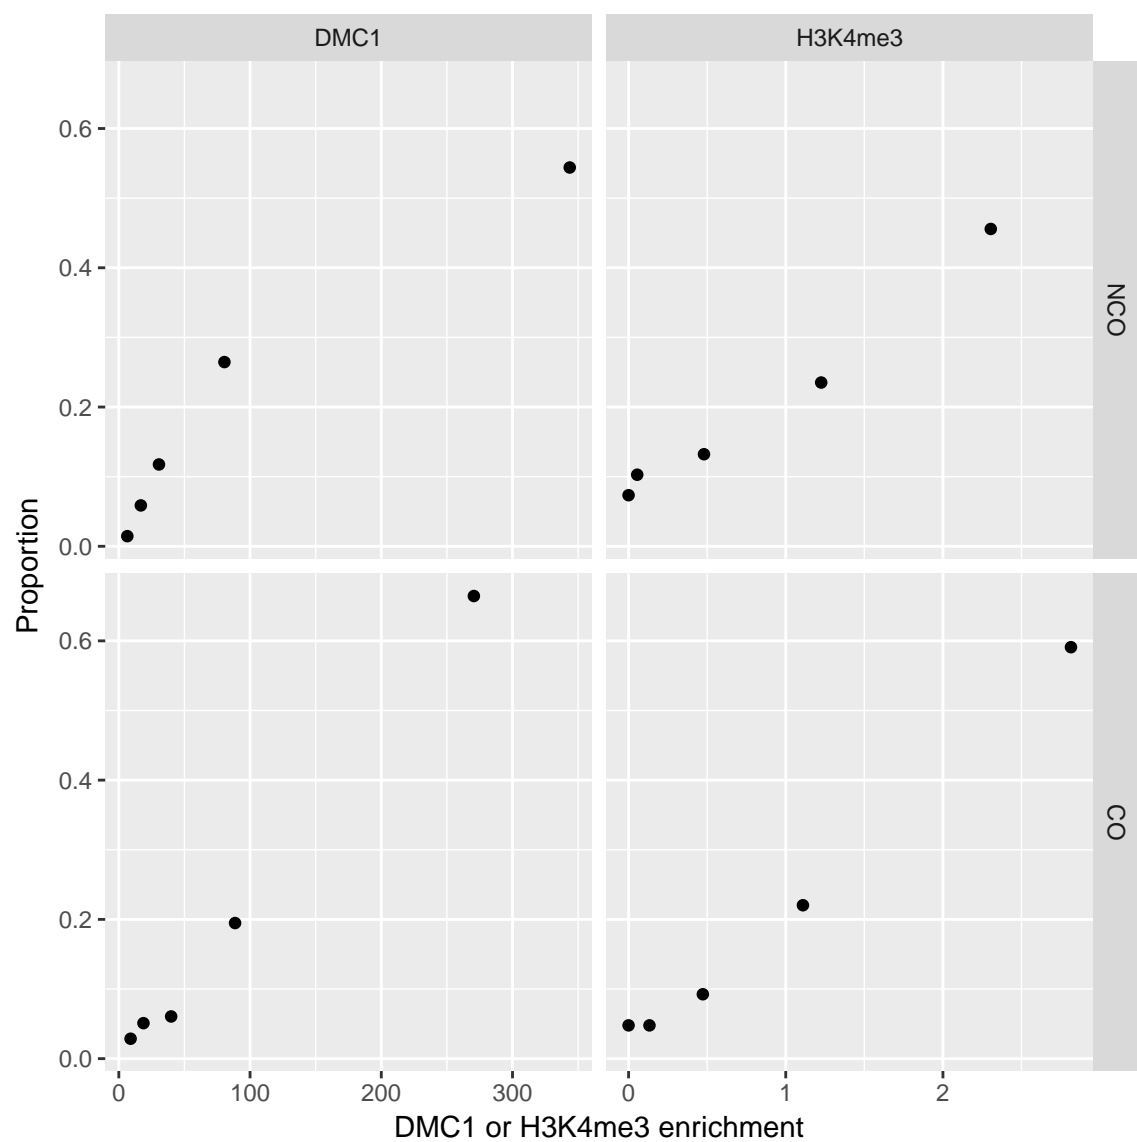

**Figure S2.** The proportion of NCO and CO events at hotspots binned into 20% quantiles by DMC1 heat and H3K4me3 enrichment in (B6 × PWD)F1 hybrids. DMC1 and H3K4me3 data from (DAVIES *et al.* 2016).
