# Supplementary material
Source: publisher figshare collection journal article supplement (https://gsajournals.figshare.com/articles/dataset/_/13233935)
Supplement: Supplementary file 3 [file 1]

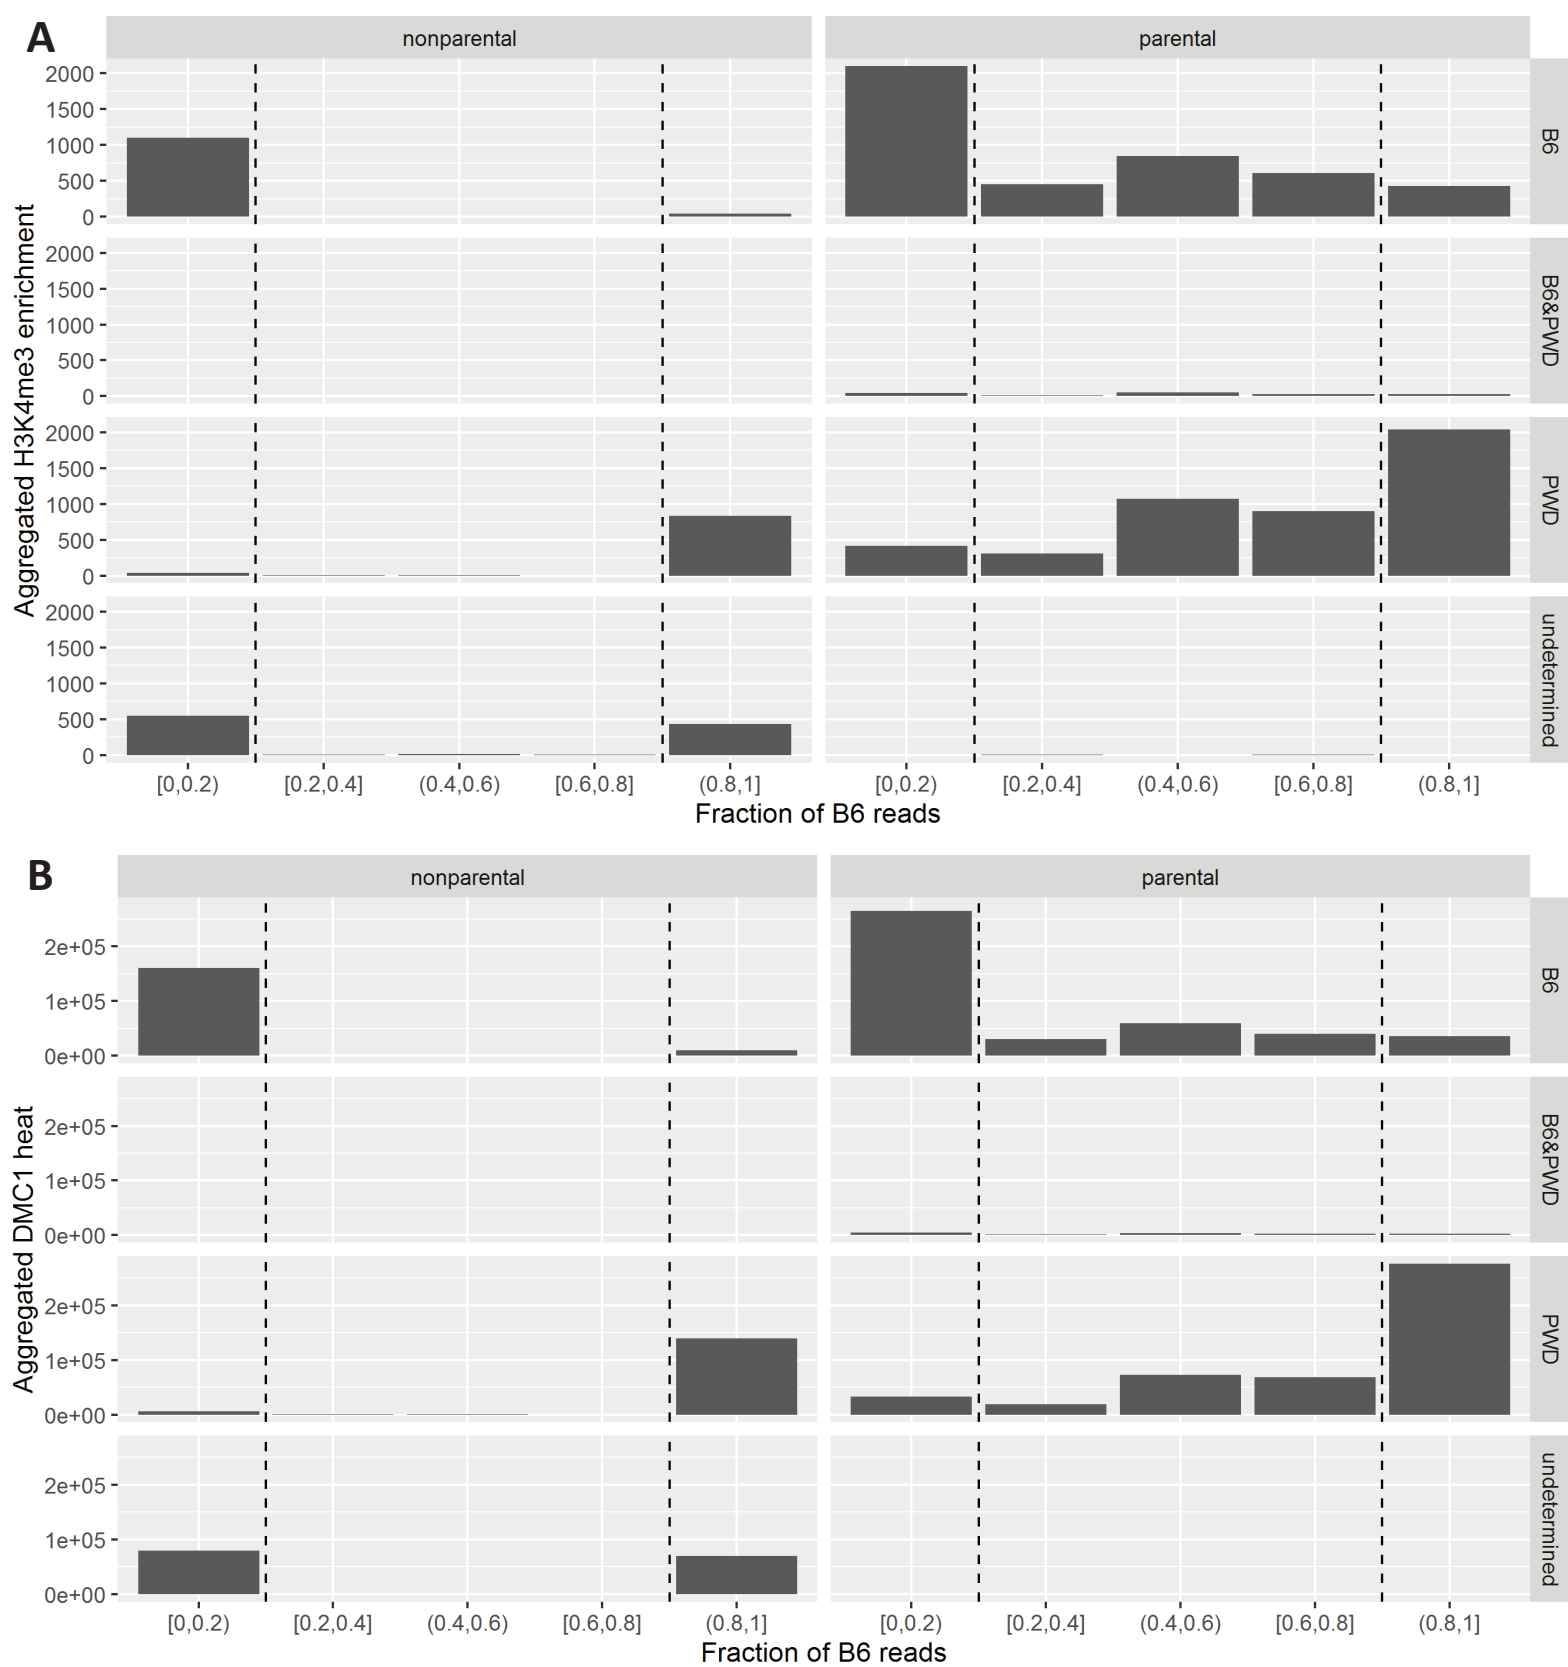

**Figure S3.** Relationship between nonparental and asymmetric meiotic DSB sites. The frequency of DSB sites is measured by **(A)** aggregated H3K4me3 enrichment and by **(B)** aggregated DMC1 heat (suggested to also reflect the time for repair). The facets are separated horizontally by the PRDM9 allele inferred to control the DSB sites. The dashed horizontal lines represent the threshold lines for symmetric/asymmetric DSBs (proportion of B6 reads within/outside 0.2-0.8 interval). Data from (DAVIES *et al.* 2016).
