# Supplementary material
Source: publisher figshare collection journal article supplement (https://gsajournals.figshare.com/articles/dataset/_/13233935)
Supplement: Supplementary file 4 [file 1]

# Table S3. Classification of NCOs based on the inferred initiating PRDM9 allele and predicted hotspot symmetry.

| Predicted NCO class         | Presence in parental strains | DMC1 dataset* |    |        | Hotspot origin*                 | No of NCOs |
|-----------------------------|------------------------------|---------------|----|--------|---------------------------------|------------|
|                             |                              | PWD           | B6 | B6xPWD |                                 |            |
| B6 symmetric                | parental                     | -             | +  | +      | B6                              | 62         |
| PWD symmetric               | parental                     | +             | -  | +      | PWD                             | 5          |
| Weak PRDM9 motif, symmetric | parental                     | +             | +  | +      | undetermined                    | 2          |
| B6 symmetric                | parental, incomparable       | -             | +  | -      | B6                              | 3          |
| B6 asymmetric               | nonparental                  | -             | -  | +      | B6                              | 7          |
| PWD asymmetric              | nonparental                  | -             | -  | +      | PWD                             | 0          |
| Weak PRDM9 motif            | nonparental                  | -             | -  | +      | undetermined                    | 7          |
| Anomalous, default **       | anomalous                    | +             | +  | +      | B6. <i>Prdm9</i> <sup>-/-</sup> | 2          |
| Anomalous, DMC1 negative    | anomalous                    | -             | -  | -      | none                            | 6          |

\* Davies et al. 2016; Smagulova et al. 2016

\*\* includes 1 NCO from (PWD-; B6+; B6xPWD+)
