# Supplementary material
Source: publisher figshare collection journal article supplement (https://gsajournals.figshare.com/articles/dataset/_/13233935)
Supplement: Supplementary file 5 [file 1]

# Table S2.

| Chromosome | Length_mm10 | SPO11_oligos | NCO_count |
|------------|-------------|--------------|-----------|
| chr1       | 191909192   | 69606        | 10        |
| chr2       | 178326651   | 73115        | 20        |
| chr3       | 156398855   | 53878        | 12        |
| chr4       | 152055611   | 60332        | 8         |
| chr5       | 147919674   | 62217        | 15        |
| chr6       | 146336543   | 52717        | 8         |
| chr17      | 91707462    | 39641        | 6         |
| chr18      | 87452634    | 34544        | 7         |
| chr19      | 58205856    | 25629        | 5         |

# SPO11 oligos data are taken from Lange et al., 2016
