# Supplementary material
Source: publisher figshare collection journal article supplement (https://gsajournals.figshare.com/articles/dataset/_/13233935)
Supplement: Supplementary file 6 [file 1]

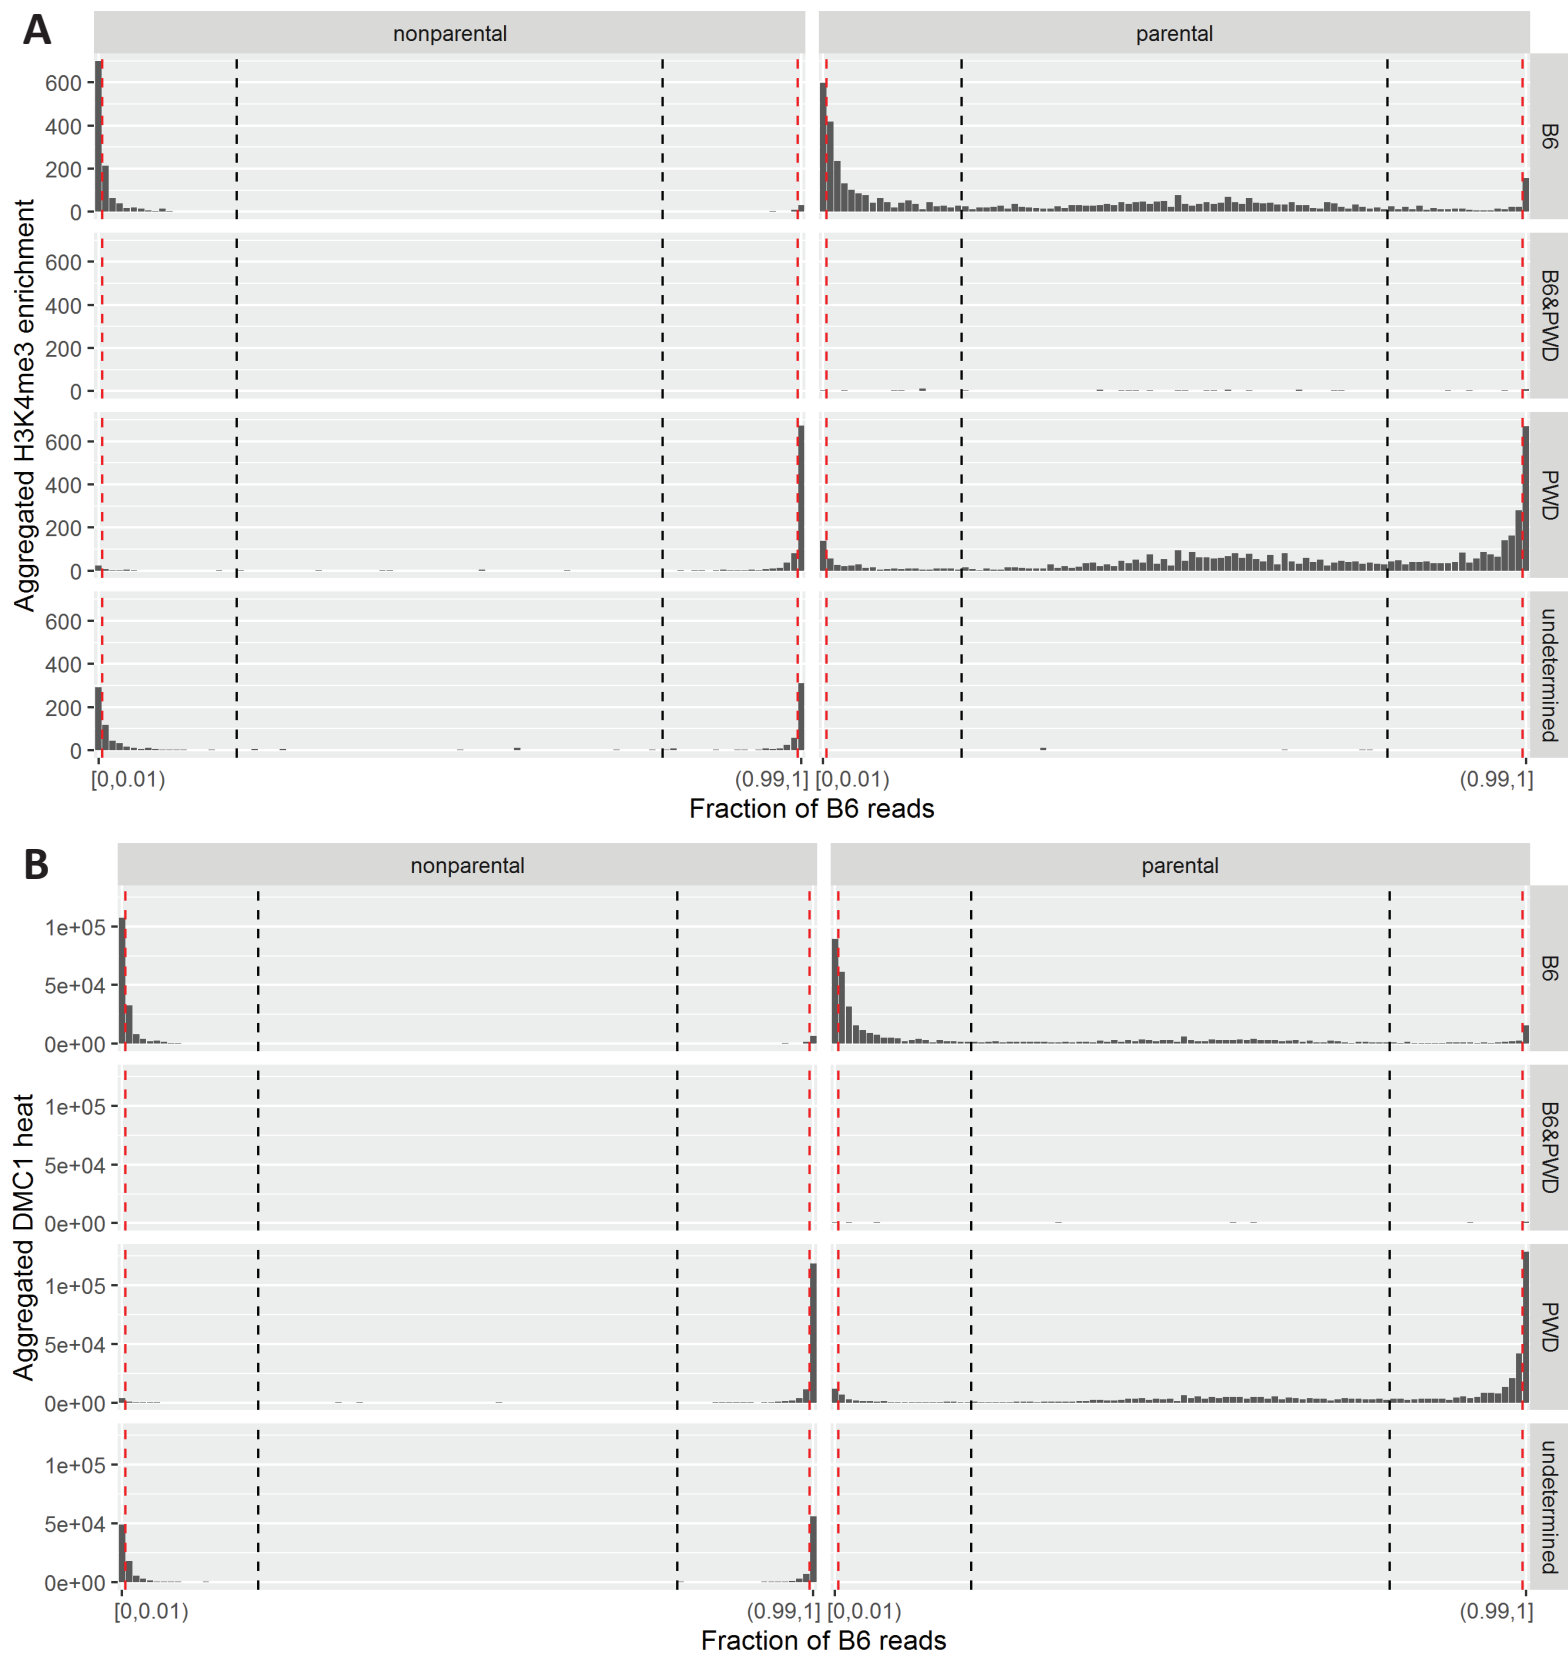

**Figure S1.** Relationship between nonparental and extremely asymmetric meiotic DSB sites.

The frequency of DSB sites is measured by **(A)** aggregated H3K4me3 enrichment and by **(B)** aggregated DMC1 heat (suggested to also reflect the time for repair). The facets are separated horizontally by the PRDM9 allele inferred to control the DSB sites. The black dashed horizontal lines represent the threshold lines for symmetric/asymmetric DSBs (proportion of B6 reads within/outside 0.2-0.8 interval). In addition, the red dashed horizontal lines represent the threshold lines for extreme asymmetry (outside 0.01-0.99 interval). Data from (DAVIES *et al.* 2016).
