# Supplementary material
Source: publisher figshare collection journal article supplement (https://gsajournals.figshare.com/articles/dataset/_/13233935)
Supplement: Supplementary file 7 [file 1]

# Table S1.

| chromosome | start     | end       | min_length | max_length | n_variants | Sanger_validated | DMC1_elated | H3K4me3_related | DMC1_B6 | DMC1_BP | DMC1_P8 | DMC1_PWD | DMC1_Prdm9_KO | PRDM9_origin | SVO11_B6 | H3K36me3_B6  | variants_coords | variants_B6      | variants_PWD | left_nonconv_coord | right_nonconv_coord | left_nonconv_B6 | left_nonconv_PWD | right_nonconv_B6 | right_nonconv_PWD |
|------------|-----------|-----------|------------|------------|------------|------------------|-------------|-----------------|---------|---------|---------|----------|---------------|--------------|----------|--------------|-----------------|------------------|--------------|--------------------|---------------------|-----------------|------------------|------------------|-------------------|
| chr1       | 13845860  | 13845929  | 70         | 277        | 3          | T                | T           | T               | T       | T       | T       | T        | T             | F            | T        | 71; 13845929 | TTT; C; G       | TTTT; T; A       | 13845847     | 13846125           | C                   | T               | C                | T                |                   |
| chr1       | 46907980  | 46907980  | 1          | 419        | 1          | T                | T           | T               | T       | T       | T       | T        | T             | F            | T        | 46907980     | G               | A                | 46907905     | 46908325           | CTT                 | ---             | C                | T                |                   |
| chr1       | 59359320  | 59359321  | 2          | 692        | 1          | T                | T           | T               | T       | T       | T       | T        | T             | F            | T        | 59359320     | TG              | GT               | 59358707     | 59359400           | G                   | A               | C                | T                |                   |
| chr1       | 61872329  | 61872329  | 1          | 69         | 1          | n.d.             | T           | T               | T       | T       | T       | T        | T             | F            | T        | 61872329     | G; C            | A; C             | 61872313     | 61872383           | G                   | T               | T                | C                |                   |
| chr1       | 63879266  | 63879271  | 6          | 117        | 2          | n.d.             | T           | T               | T       | T       | T       | T        | T             | F            | T        | 56; 63879271 | A; G; C         | A; G             | 63879207     | 63879325           | G                   | A               | A                | C                |                   |
| chr1       | 67960742  | 67963400  | 2659       | 3966       | 8          | T                | T           | T               | T       | T       | T       | T        | T             | F            | T        | 20; 67963400 | A; G; A; C; T   | A; G; A; G; T; A | 67960131     | 67964098           | A                   | -----           | 3CCGAG           |                  |                   |
| chr1       | 128517316 | 128517318 | 3          | 985        | 2          | n.d.             | T           | T               | T       | T       | T       | T        | T             | F            | T        | 5; 128517318 | C; G            | T; T             | 128517205    | 128518191          | G                   | A               | T                | A                |                   |
| chr1       | 137135844 | 137135844 | 1          | 141        | 1          | n.d.             | T           | T               | T       | T       | T       | T        | T             | F            | T        | 7; 137135844 | G               | C                | 137135739    | 137135881          | A                   | G               | C                | T                |                   |
| chr1       | 165896307 | 165896311 | 5          | 680        | 2          | T                | T           | T               | T       | T       | T       | T        | T             | F            | T        | 7; 165896311 | C; G            | T; A             | 165895698    | 165896379          | C                   | T               | A                | C                |                   |
| chr1       | 183578162 | 183578162 | 1          | 542        | 1          | T                | T           | T               | T       | T       | T       | T        | T             | F            | T        | 183578162    | G               | T                | 183577957    | 183578500          | C                   | G               | T                | C                |                   |
| chr2       | 3736957   | 3736957   | 1          | 57         | 1          | n.d.             | T           | T               | T       | T       | T       | T        | T             | F            | T        | 3736957      | G               | T                | 3736938      | 3736996            | T                   | C               | G                | A                |                   |
| chr2       | 5040747   | 5040747   | 1          | 133        | 1          | n.d.             | T           | T               | T       | T       | T       | T        | T             | F            | T        | 5040747      | G               | A                | 5040687      | 5040821            | AAA                 | ---             | C                | T                |                   |
| chr2       | 10336587  | 10336592  | 6          | 264        | 2          | T                | T           | T               | T       | T       | T       | T        | T             | F            | T        | 87; 10336592 | T; C            | G; T             | 10336480     | 10336745           | T                   | A               | A                | T                |                   |
| chr2       | 11688991  | 11689010  | 20         | 549        | 3          | T                | T           | T               | T       | T       | T       | T        | T             | F            | T        | 07; 11689010 | C; G; G         | A; A; A          | 11688523     | 11689073           | A                   | -               | C                | T                |                   |
| chr2       | 13697711  | 13697711  | 1          | 431        | 1          | T                | T           | T               | T       | T       | T       | T        | T             | F            | T        | 13697711     | A               | G                | 13697334     | 13697766           | AC                  | --              | T                | G                |                   |
| chr2       | 28188305  | 28188305  | 1          | 361        | 1          | T                | T           | T               | T       | T       | T       | T        | T             | F            | T        | 28188305     | G               | A                | 28188155     | 28188517           | A                   | A               | G                | A                |                   |
| chr2       | 32226478  | 32226493  | 16         | 147        | 2          | n.d.             | T           | T               | T       | T       | T       | T        | T             | F            | T        | 78; 32226493 | C; A            | A; C             | 32226396     | 32226544           | C                   | G               | A                | G                |                   |
| chr2       | 58517611  | 58517618  | 8          | 270        | 2          | T                | T           | T               | T       | T       | T       | T        | T             | F            | T        | 11; 58517618 | G; C            | A; T             | 58517431     | 58517702           | G                   | A               | GTAGC            | -----            |                   |
| chr2       | 61489637  | 61489637  | 1          | 643        | 1          | T                | T           | T               | T       | T       | T       | T        | T             | F            | T        | 61489637     | C               | G                | 61489162     | 61489806           | -----               | 3TGTGT          | T                | -                |                   |
| chr2       | 72241857  | 72241857  | 1          | 462        | 1          | T                | T           | T               | T       | T       | T       | T        | T             | F            | T        | 72241857     | C               | A                | 72241474     | 72241937           | G                   | A               | T                | A                |                   |
| chr2       | 74937052  | 74937064  | 13         | 384        | 2          | T                | T           | T               | T       | T       | T       | T        | T             | F            | T        | 52; 74937064 | G; C            | A; T             | 74936895     | 74937280           | C                   | T               | C                | A                |                   |
| chr2       | 78357403  | 78357403  | 1          | 50         | 1          | n.d.             | T           | T               | T       | T       | T       | T        | T             | F            | T        | 78357403     | C               | G                | 78357374     | 78357425           | G                   | A               | G                | A                |                   |
| chr2       | 79679676  | 79679676  | 1          | 330        | 1          | T                | T           | T               | T       | T       | T       | T        | T             | F            | T        | 79679676     | G               | A                | 79679609     | 79679940           | A                   | G               | A                | T                |                   |
| chr2       | 85528071  | 85528071  | 1          | 131        | 1          | n.d.             | T           | T               | T       | T       | T       | T        | T             | F            | T        | 85528071     | C               | T                | 85528033     | 85528165           | C                   | T               | C                | T                |                   |
| chr2       | 96760589  | 96760589  | 1          | 169        | 1          | T                | T           | T               | T       | T       | T       | T        | T             | F            | T        | 96760589     | C               | T                | 96760507     | 96760767           | G                   | A               | C                | G                |                   |
| chr2       | 116516318 | 116516318 | 1          | 126        | 1          | n.d.             | T           | T               | T       | T       | T       | T        | T             | F            | T        | 116516318    | T               | G                | 116516266    | 116516393          | A                   | G               | A                | G                |                   |
| chr2       | 135984537 | 135984537 | 1          | 46         | 1          | n.d.             | T           | T               | T       | T       | T       | T        | T             | F            | T        | 135984537    | T               | C                | 135984527    | 135984574          | G                   | A               | T                | C                |                   |
| chr2       | 147805390 | 147805390 | 1          | 383        | 1          | T                | T           | T               | T       | T       | T       | T        | T             | F            | T        | 147805390    | C               | T                | 147805306    | 147805690          | G                   | A               | C                | T                |                   |
| chr2       | 150590002 | 150590002 | 1          | 687        | 1          | T                | T           | T               | T       | T       | T       | T        | T             | F            | T        | 150590002    | C               | T                | 150589924    | 150590612          | -                   | C               | C                | A                |                   |
| chr2       | 166617293 | 166617524 | 232        | 370        | 1          | T                | T           | T               | T       | T       | T       | T        | T             | F            | T        | 3; 166617524 | ncC*; ncC*; G   | ncT*; ncT*; A    | 166617226    | 166617597          | G                   | A               | G                | A                |                   |
| chr3       | 16828944  | 16828944  | 1          | 267        | 1          | T                | T           | T               | T       | T       | T       | T        | T             | F            | T        | 16828944     | C               | T                | 16828894     | 16829162           | A                   | G               | G                | T                |                   |
| chr3       | 22128566  | 22128566  | 1          | 378        | 1          | T                | T           | T               | T       | T       | T       | T        | T             | F            | T        | 22128566     | G               | A                | 22128341     | 22128720           | T                   | C               | T                | C                |                   |
| chr3       | 36830205  | 36830205  | 1          | 492        | 1          | T                | T           | T               | T       | T       | T       | T        | T             | F            | T        | 36830205     | G               | A                | 36829989     | 36830482           | -                   | T               | G                | T                |                   |
| chr3       | 51188409  | 51188409  | 1          | 182        | 1          | T                | T           | T               | T       | T       | T       | T        | T             | F            | T        | 51188409     | T               | C                | 51188366     | 51188549           | T                   | A               | AAAA             | -----            |                   |
| chr3       | 65603278  | 65603278  | 1          | 662        | 1          | T                | T           | T               | T       | T       | T       | T        | T             | F            | T        | 65603278     | C               | G                | 65602922     | 65603585           | G                   | A               | -                | -                |                   |
| chr3       | 65655136  | 65655136  | 1          | 466        | 1          | T                | T           | T               | T       | T       | T       | T        | T             | F            | T        | 65655136     | C               | G                | 65654711     | 65655178           | C                   | T               | G                | T                |                   |
| chr3       | 69739785  | 69739785  | 1          | 232        | 1          | n.d.             | T           | T               | T       | T       | T       | T        | T             | F            | T        | 69739785     | G               | T                | 69739758     | 69739991           | A                   | G               | A                | T                |                   |
| chr3       | 85792585  | 85792585  | 1          | 138        | 1          | n.d.             | T           | T               | T       | T       | T       | T        | T             | F            | T        | 85792585     | G               | A                | 85792540     | 85792679           | G                   | T               | C                | A                |                   |
| chr3       | 95869211  | 95869211  | 1          | 36         | 1          | n.d.             | T           | T               | T       | T       | T       | T        | T             | F            | T        | 95869211     | G               | A                | 95869199     | 95869236           | C                   | T               | G                | A                |                   |
| chr3       | 107617094 | 107617095 | 2          | 185        | 1          | T                | T           | T               | T       | T       | T       | T        | T             | F            | T        | 107617094    | CG              | TA               | 107616928    | 107617114          | G                   | A               | A                | C                |                   |
| chr3       | 130702831 | 130702831 | 1          | 177        | 1          | T                | T           | T               | T       | T       | T       | T        | T             | F            | T        | 130702831    | C               | T                | 130702792    | 130702970          | A                   | C               | A                | G                |                   |
| chr3       | 136064382 | 136064385 | 4          | 622        | 1          | T                | T           | T               | T       | T       | T       | T        | T             | F            | T        | 3; 136064385 | G; C            | A; T             | 136063966    | 136064589          | G                   | A               | GGA              | ATT              |                   |
| chr4       | 6396524   | 6396541   | 18         | 399        | 2          | T                | T           | T               | T       | T       | T       | T        | T             | F            | T        | 524; 6396541 | C; T            | T; C             | 6396368      | 6396768            | C                   | T               | GGA              | T                |                   |
| chr4       | 10936243  | 10936243  | 1          | 448        | 1          | T                | T           | T               | T       | T       | T       | T        | T             | F            | T        | 10936243     | C               | T                | 10935986     | 10936435           | --                  | GT              | G                | A                |                   |
| chr4       | 49528333  | 49528367  | 35         | 225        | 3          | T                | T           | T               | T       | T       | T       | T        | T             | F            | T        | 35; 49528367 | C; C; C         | T; G; T          | 49528278     | 49528504           | G                   | A               | C                | T                |                   |
| chr4       | 59369670  | 59369670  | 1          | 286        | 1          | T                | T           | T               | T       | T       | T       | T        | T             | F            | T        | 59369670     | C               | T                | 59369506     | 59369793           | A                   | G               | T                | C                |                   |
| chr4       | 83240097  | 83240097  | 1          | 260        | 1          | n.d.             | T           | T               | T       | T       | T       | T        | T             | F            | T        | 83240097     | C               | T                | 83240079     | 83240340           | T                   | G               | A                | G                |                   |
| chr4       | 92481179  | 92481179  | 1          | 596        | 1          | T                | F           | F               | F       | F       | F       | F        | F             | no_DMC1      | F        | F            | 92481179        | T                | C            | 92480956           | 92481553            | A               | G                | GTGTG            | -----             |
| chr4       | 125451332 | 125451332 | 1          | 661        | 1          | T                | T           | T               | T       | T       | T       | T        | T             | F            | T        | 125451332    | C               | T                | 125451295    | 125451957          | A                   | T               | C                | -----            |                   |
| chr4       | 142990293 | 142990308 | 16         | 364        | 2          | n.d.             | T           | T               | T       | T       | T       | T        | T             | F            | T        | 3; 142990308 | --; C           | CT; T            | 142990122    | 142990487          | A                   | C               | G                | A                |                   |
| chr5       | 6242093   | 6242323   | 231        | 407        | 2          | T                | T           | T               | T       | T       | T       | T        | T             | F            | T        | 093; 6242323 | C; C            | T; G             | 6242023      | 6242431            | AT                  | GG              | A                | C                |                   |
| chr5       | 20789067  | 20789067  | 1          | 115        | 1          | n.d.             | T           | T               | T       | T       | T       | T        | T             | F            | T        | 20789067     | C               | T                | 20789051     | 20789167           | C                   | T               | -                | G                |                   |
| chr5       | 27852657  | 27852657  | 1          | 338        | 1          | T                | T           | T               | T       | T       | T       | T        | T             | F            | T        | 27852657     | G               | T                | 27852582     | 27852921           | -----               | GAGGG           | T                | -                |                   |
| chr5       | 51691842  | 51691842  | 1          | 92         | 1          | n.d.             | T           | T               | T       | T       | T       | T        | T             | F            | T        | 51691842     | A               | G                | 51691831     | 51691924           | G                   | A               | -                | -                |                   |
| chr5       | 55484917  | 55484946  | 30         | 278        | 2          | T                | T           | T               | T       | T       | T       | T        | T             | F            | T        | 17; 55484946 | C; C            | T; G             | 55484708     | 55484987           | C                   | A               | CCCCCT           | -----            |                   |
| chr5       | 90775650  | 90775650  | 1          | 61         | 1          | n.d.             | T           | T               | T       | T       | T       | T        | T             | F            | T        | 90775650     | G               | A                | 90775609     | 90775671           | A                   | G               | C                | A                |                   |
| chr5       | 96571457  | 96571457  | 1          | 94         | 1          | n.d.             | T           | T               | T       | T       | T       | T        | T             | F            | T        | 96571457     | G               | T                | 96571409     | 96571504           | C                   | T               | G                | A                |                   |
| chr5       | 102062273 | 102062273 | 1          | 190        | 1          | T                | T           | T               | T       | T       | T       | T        | T             | F            | T        | 102062273    | G               | A                | 102062209    | 102062400          | C                   | T               | A                | -                |                   |
| chr5       | 104084656 | 104084656 | 1          | 340        | 1          | T                | T           | T               | T       | T       | T       | T        | T             | F            | T        | 104084656    | T               | A                | 104084370    | 104084711          | G                   | A               | -----            | CTAGG            |                   |
| chr5       | 108572496 | 108572496 | 1          | 441        | 1          | T                | T           | T               | T       | T       | T       | T        | T             | F            | T        | 108572496    | G               | A                | 108572066    | 108572508          | C                   | T               | T                | CC               |                   |
| chr5       | 117528325 | 117528325 | 1          | 380        | 1          | T                | T           | T               | T       | T       | T       | T        | T             | F            | T        | 117528325    | G               | A                | 117528280    | 117528661          | G                   | A               | C                | T                |                   |
| chr5       | 119304743 | 119304775 | 33         | 110        | 2          | n.d.             | T           | T               | T       | T       | T       | T        | T             | F            | T        | 3; 119304775 | A; C            | G; T             | 119304692    | 119304803          | C                   | T               | G                | -                |                   |
| chr5       | 125695123 | 125695137 | 15         | 211        | 2          | T                | T           | T               | T       | T       | T       | T        | T             | F            | T        | 3; 125695137 | T; C            | C; A             | 125695019    | 125695231          | A                   | -               | T                | C                |                   |
| chr5       | 141144023 | 141144023 | 1          | 246        | 1          | n.d.             | T           | T               | T       | T       | T       | T        | T             | F            | T        | 141144023    | T               | C                | 141143846    | 141144093          | G                   | A               | G                | A                |                   |
| chr5       | 148185214 | 148185214 | 1          | 54         | 1          | T                | F           | F               | F       | F       | F       | F        | F             | no_DMC1      | F        | F            | 148185214       | T                | C            | 148185183          | 148185238           | C               | -                | T                | G                 |
| chr6       | 18095110  | 18095110  | 1          | 159        | 1          | n.d.             | T           | T               | T       | T       | T       | T        | T             | F            | T        | 18095110     | C               | T                | 18095046     | 18095206           | C                   | A               | C                | G                |                   |
| chr6       | 36814629  |           |            |            |            |                  |             |                 |         |         |         |          |               |              |          |              |                 |                  |              |                    |                     |                 |                  |                  |                   |
